# Supplementary figures and images for: Combining a physics-informed broad learning system and multimodal spectral fusion for accurate analysis of chromium speciation in tailings
Source: Royal Society of Chemistry journal article supplement (doi:10.1039/d5ja00383k), 2025-12-03

XRF-GADF

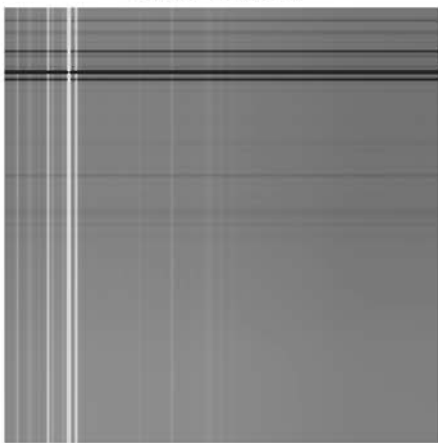

XRF-GASF

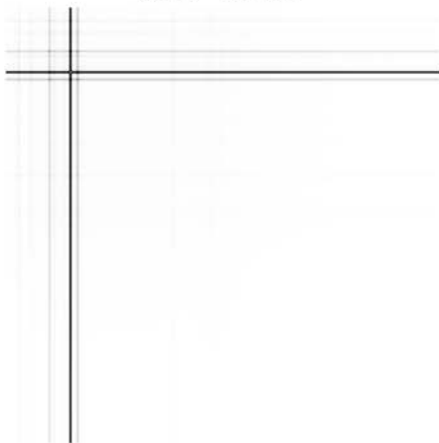

NIR-GADF

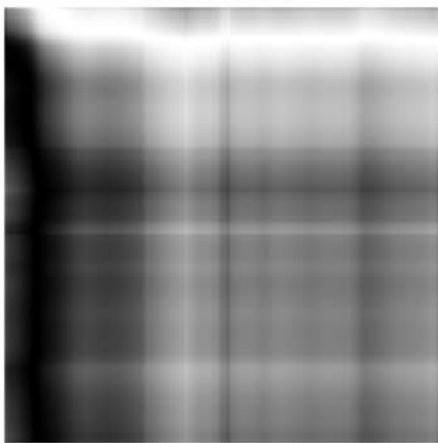

NIR-GASF

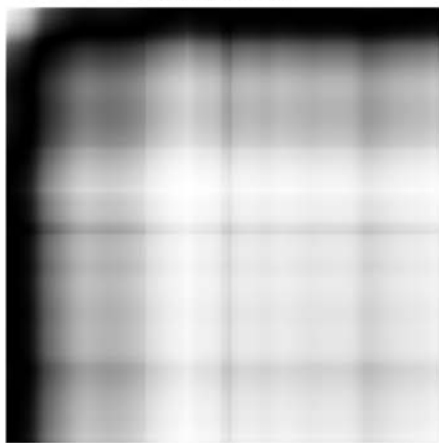

GADF-fused

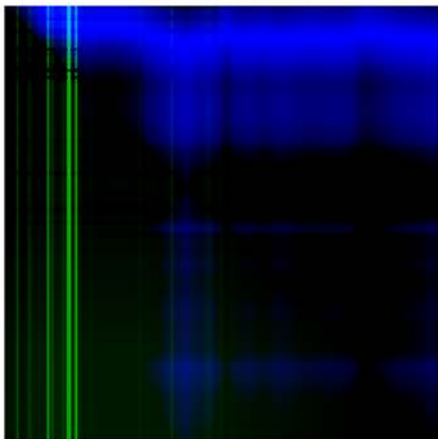

GASD-fused

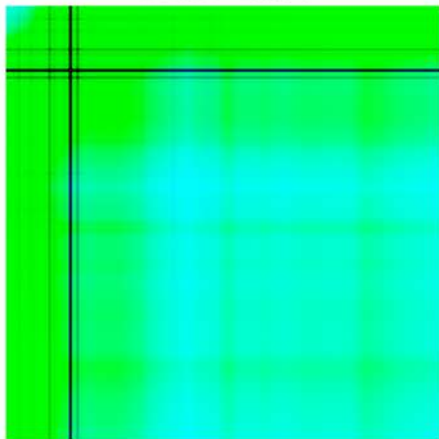

Supplement: d5ja00383k1.zip [file GADF_GASF trans.pdf › 新建文件夹/GADF_GASF trans.pdf]

A

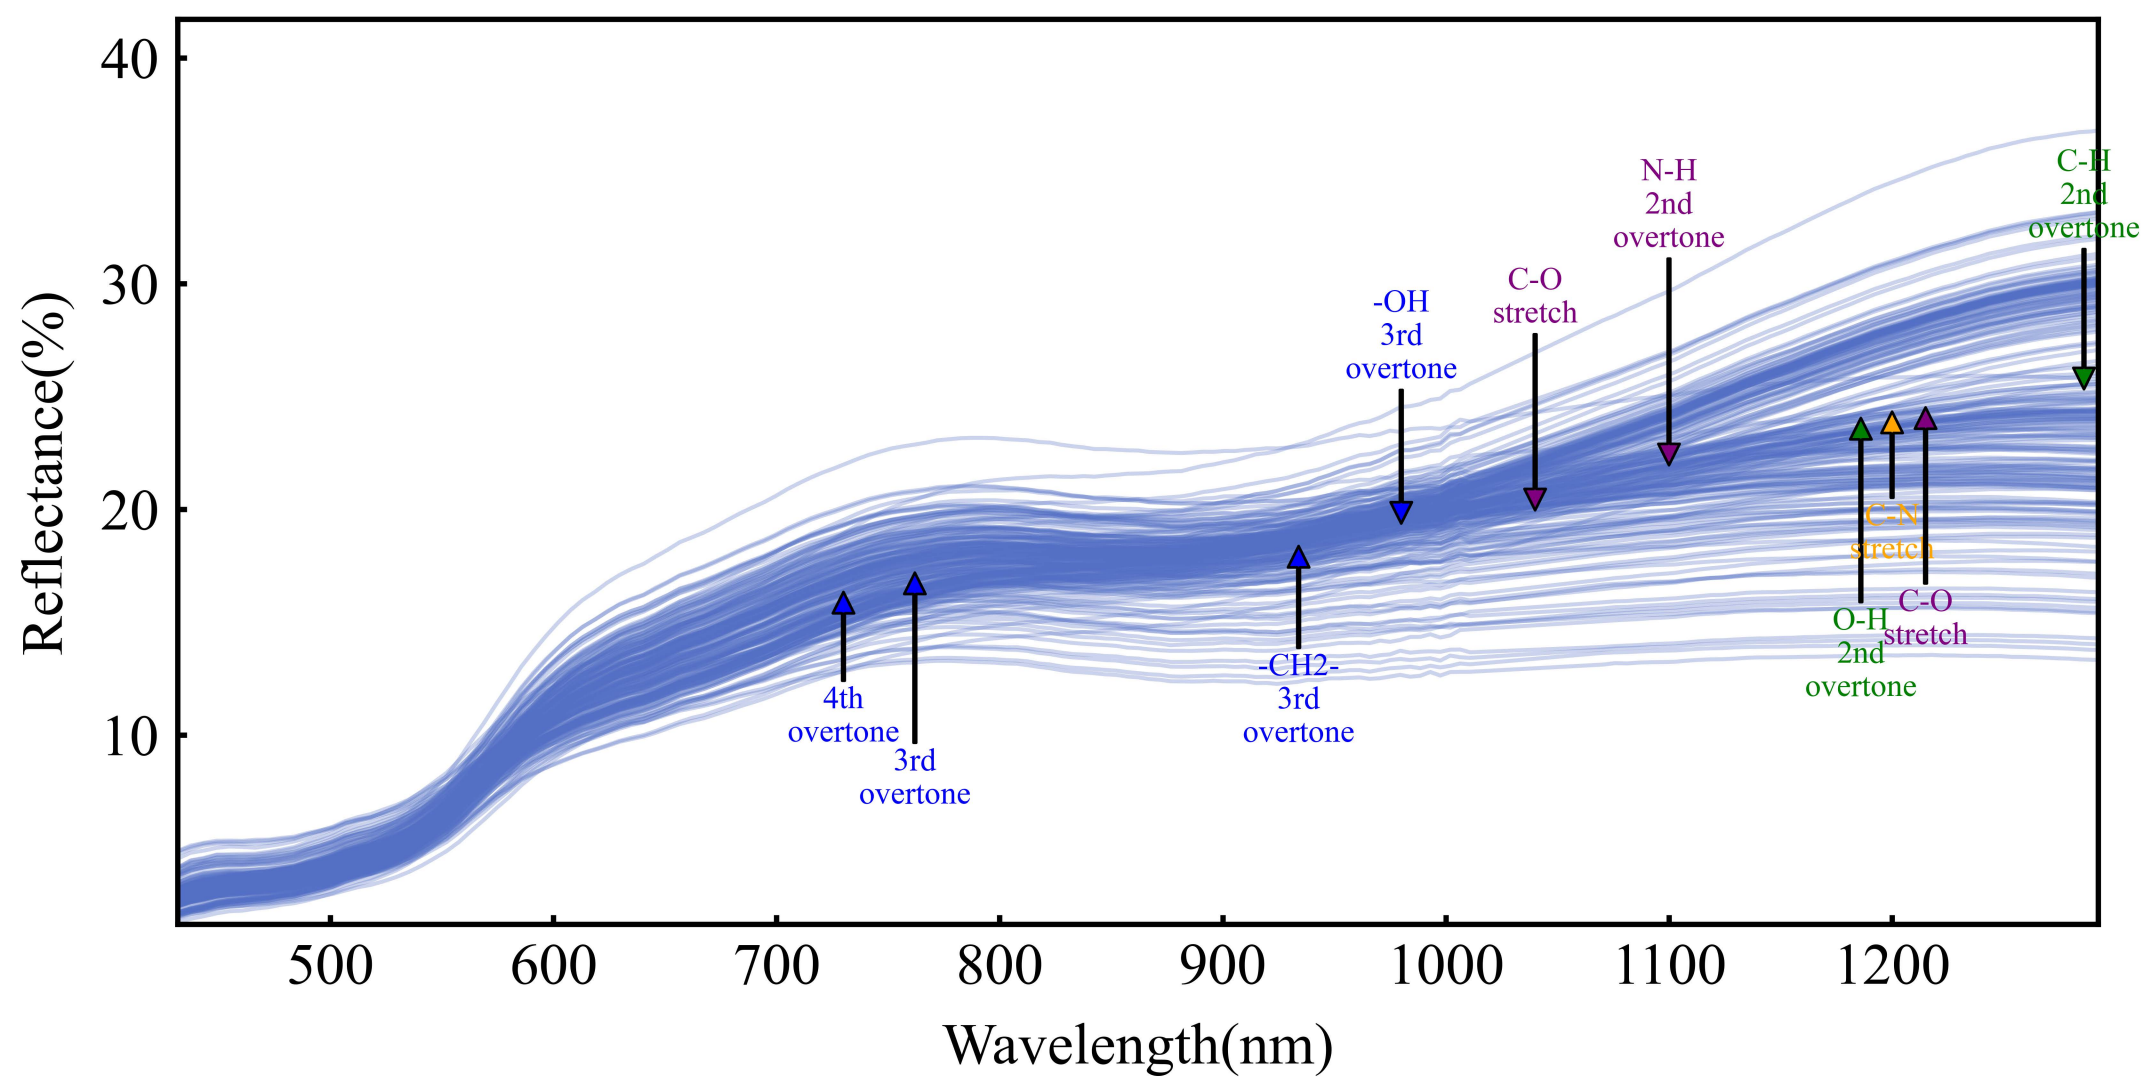

B

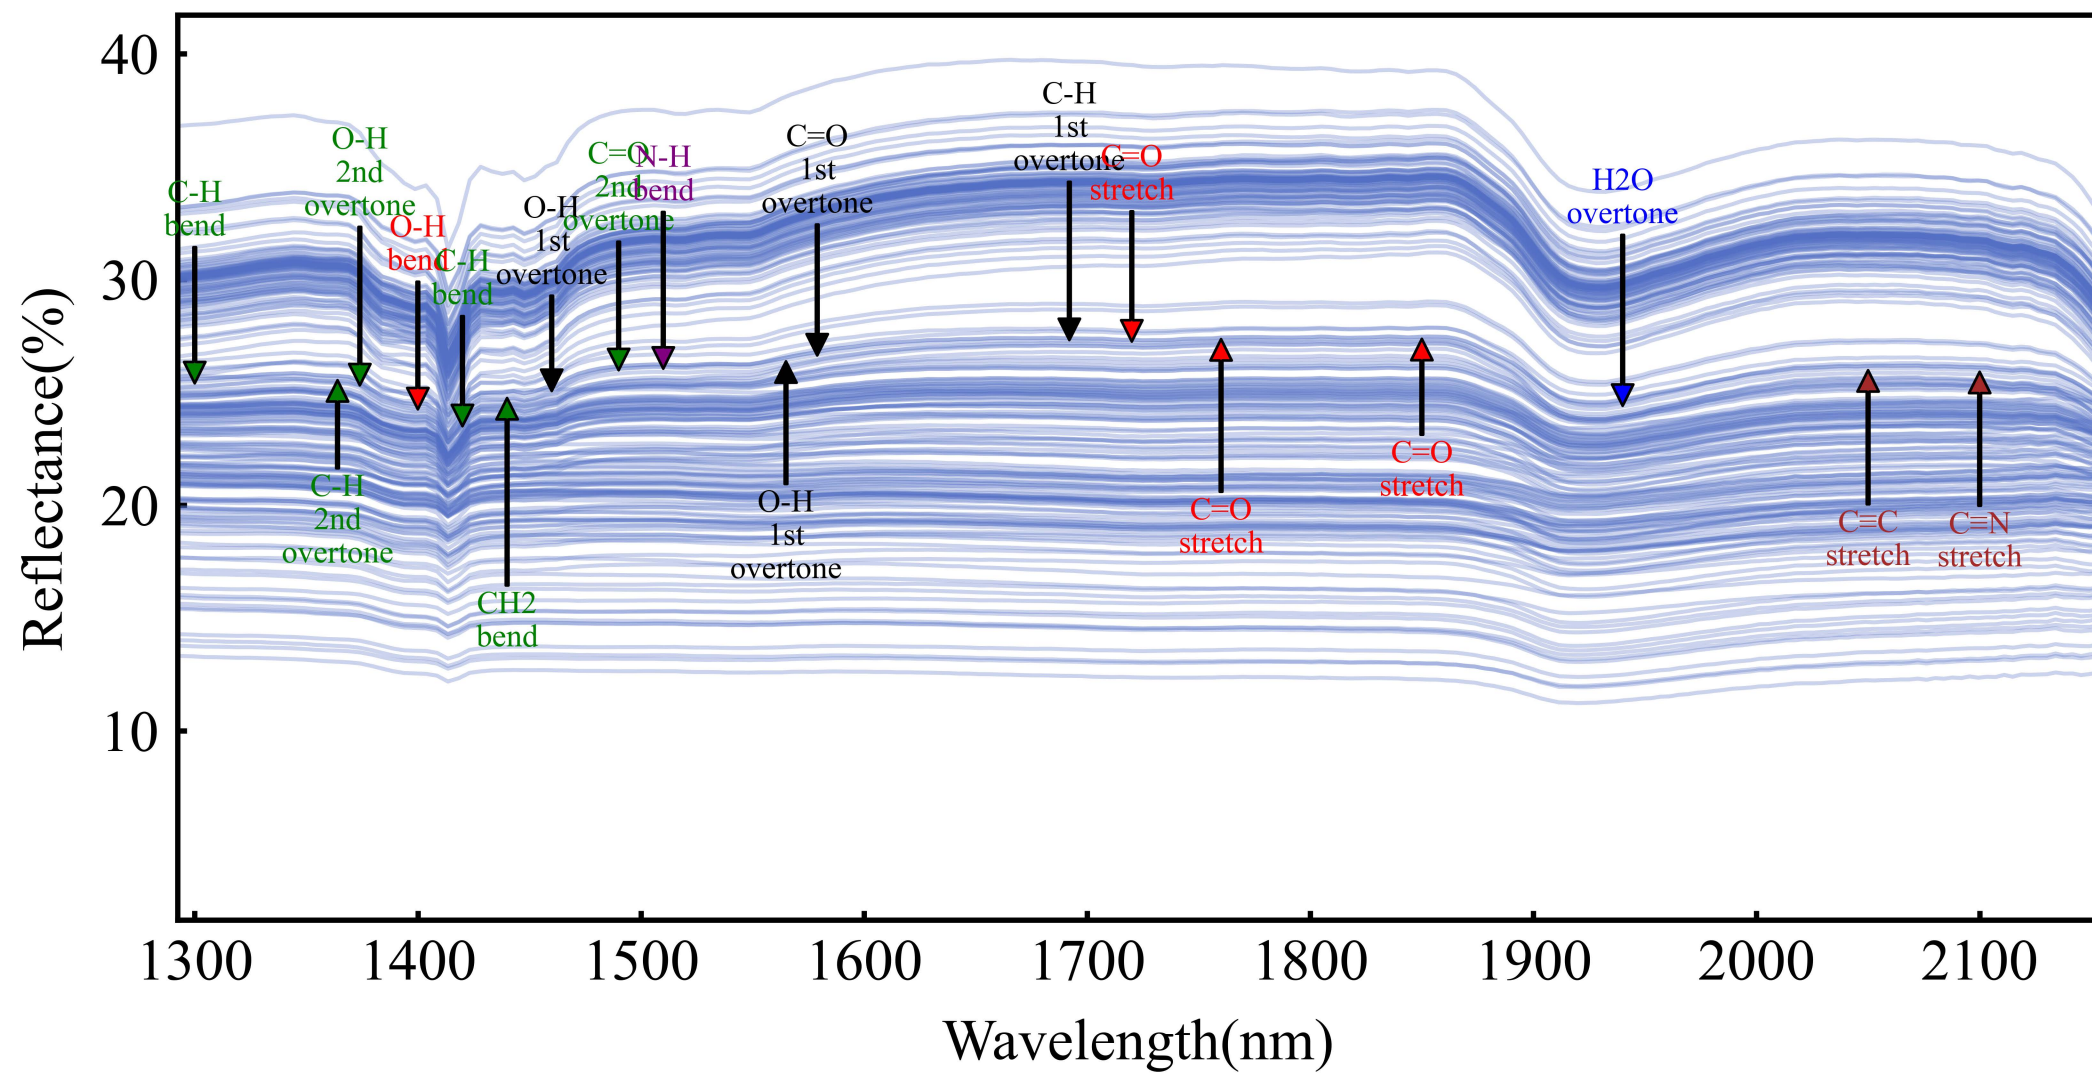

Supplement: d5ja00383k1.zip [file NIR_with_label.pdf › 新建文件夹/NIR_with_label.pdf]

RDA2

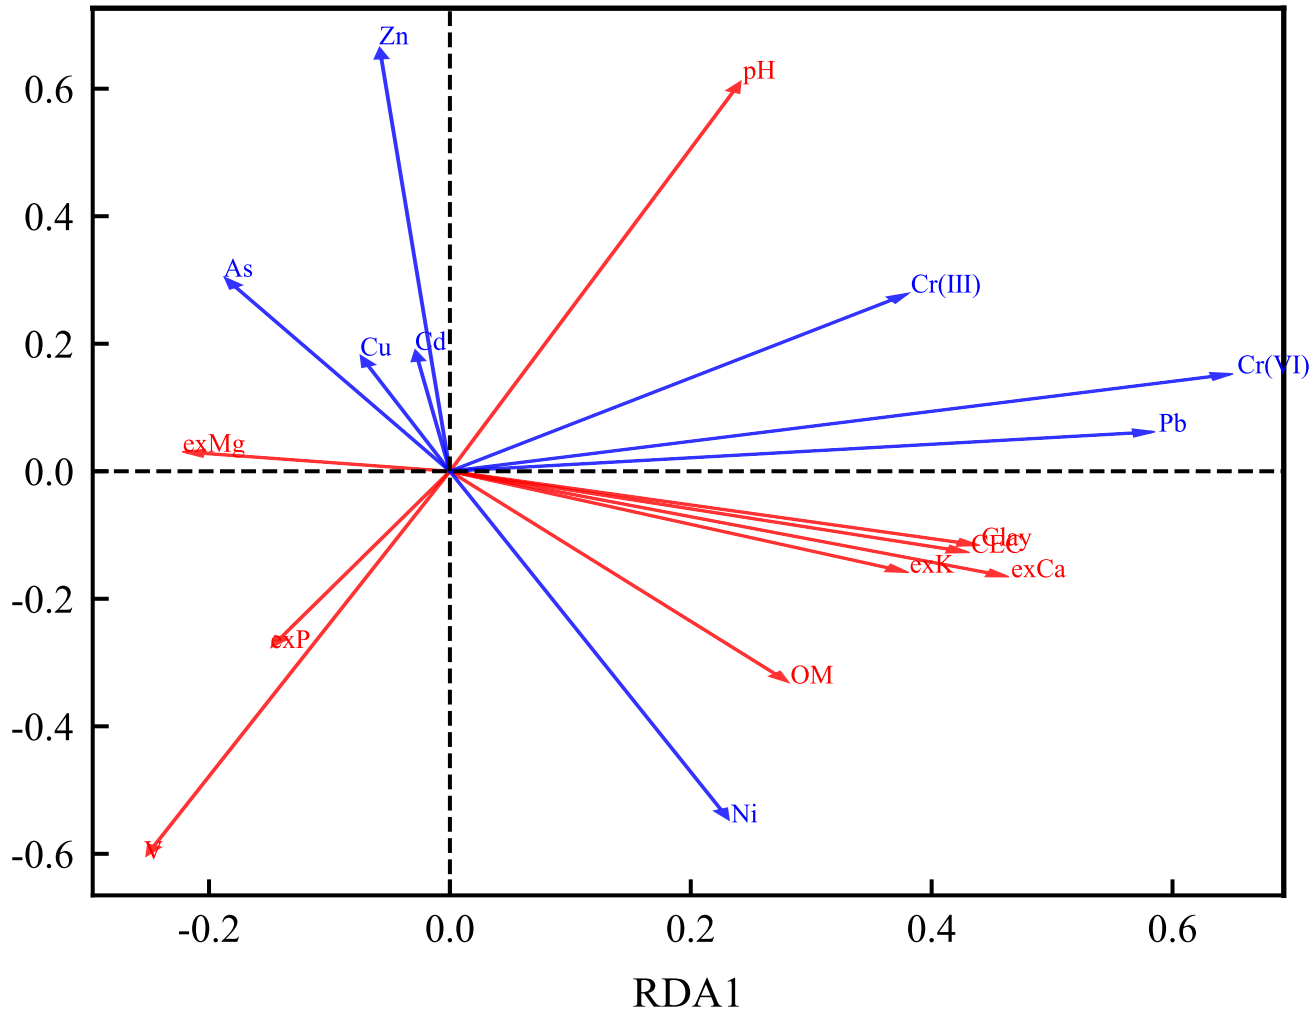

Supplement: d5ja00383k1.zip [file RDA.pdf › 新建文件夹/RDA.pdf]

Recognition Rate(%)

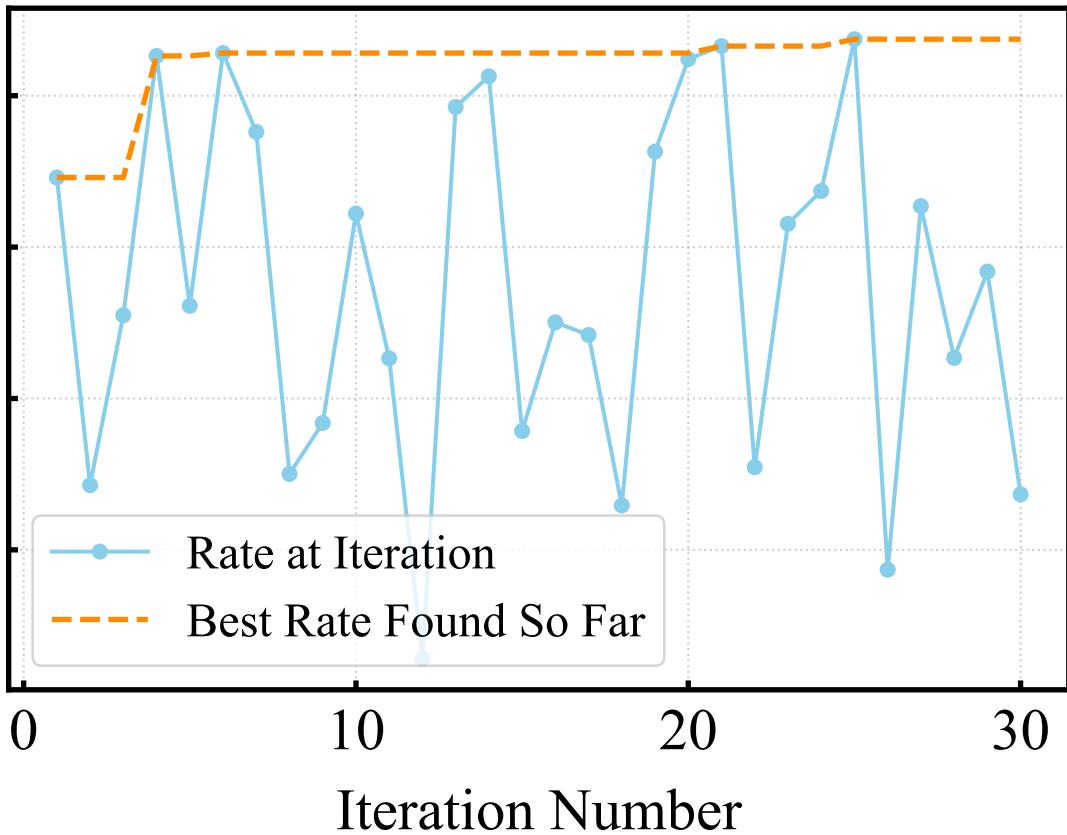

Supplement: d5ja00383k1.zip [file appendix_figure_A1_performance_trace.pdf › 新建文件夹/appendix_figure_A1_performance_trace.pdf]

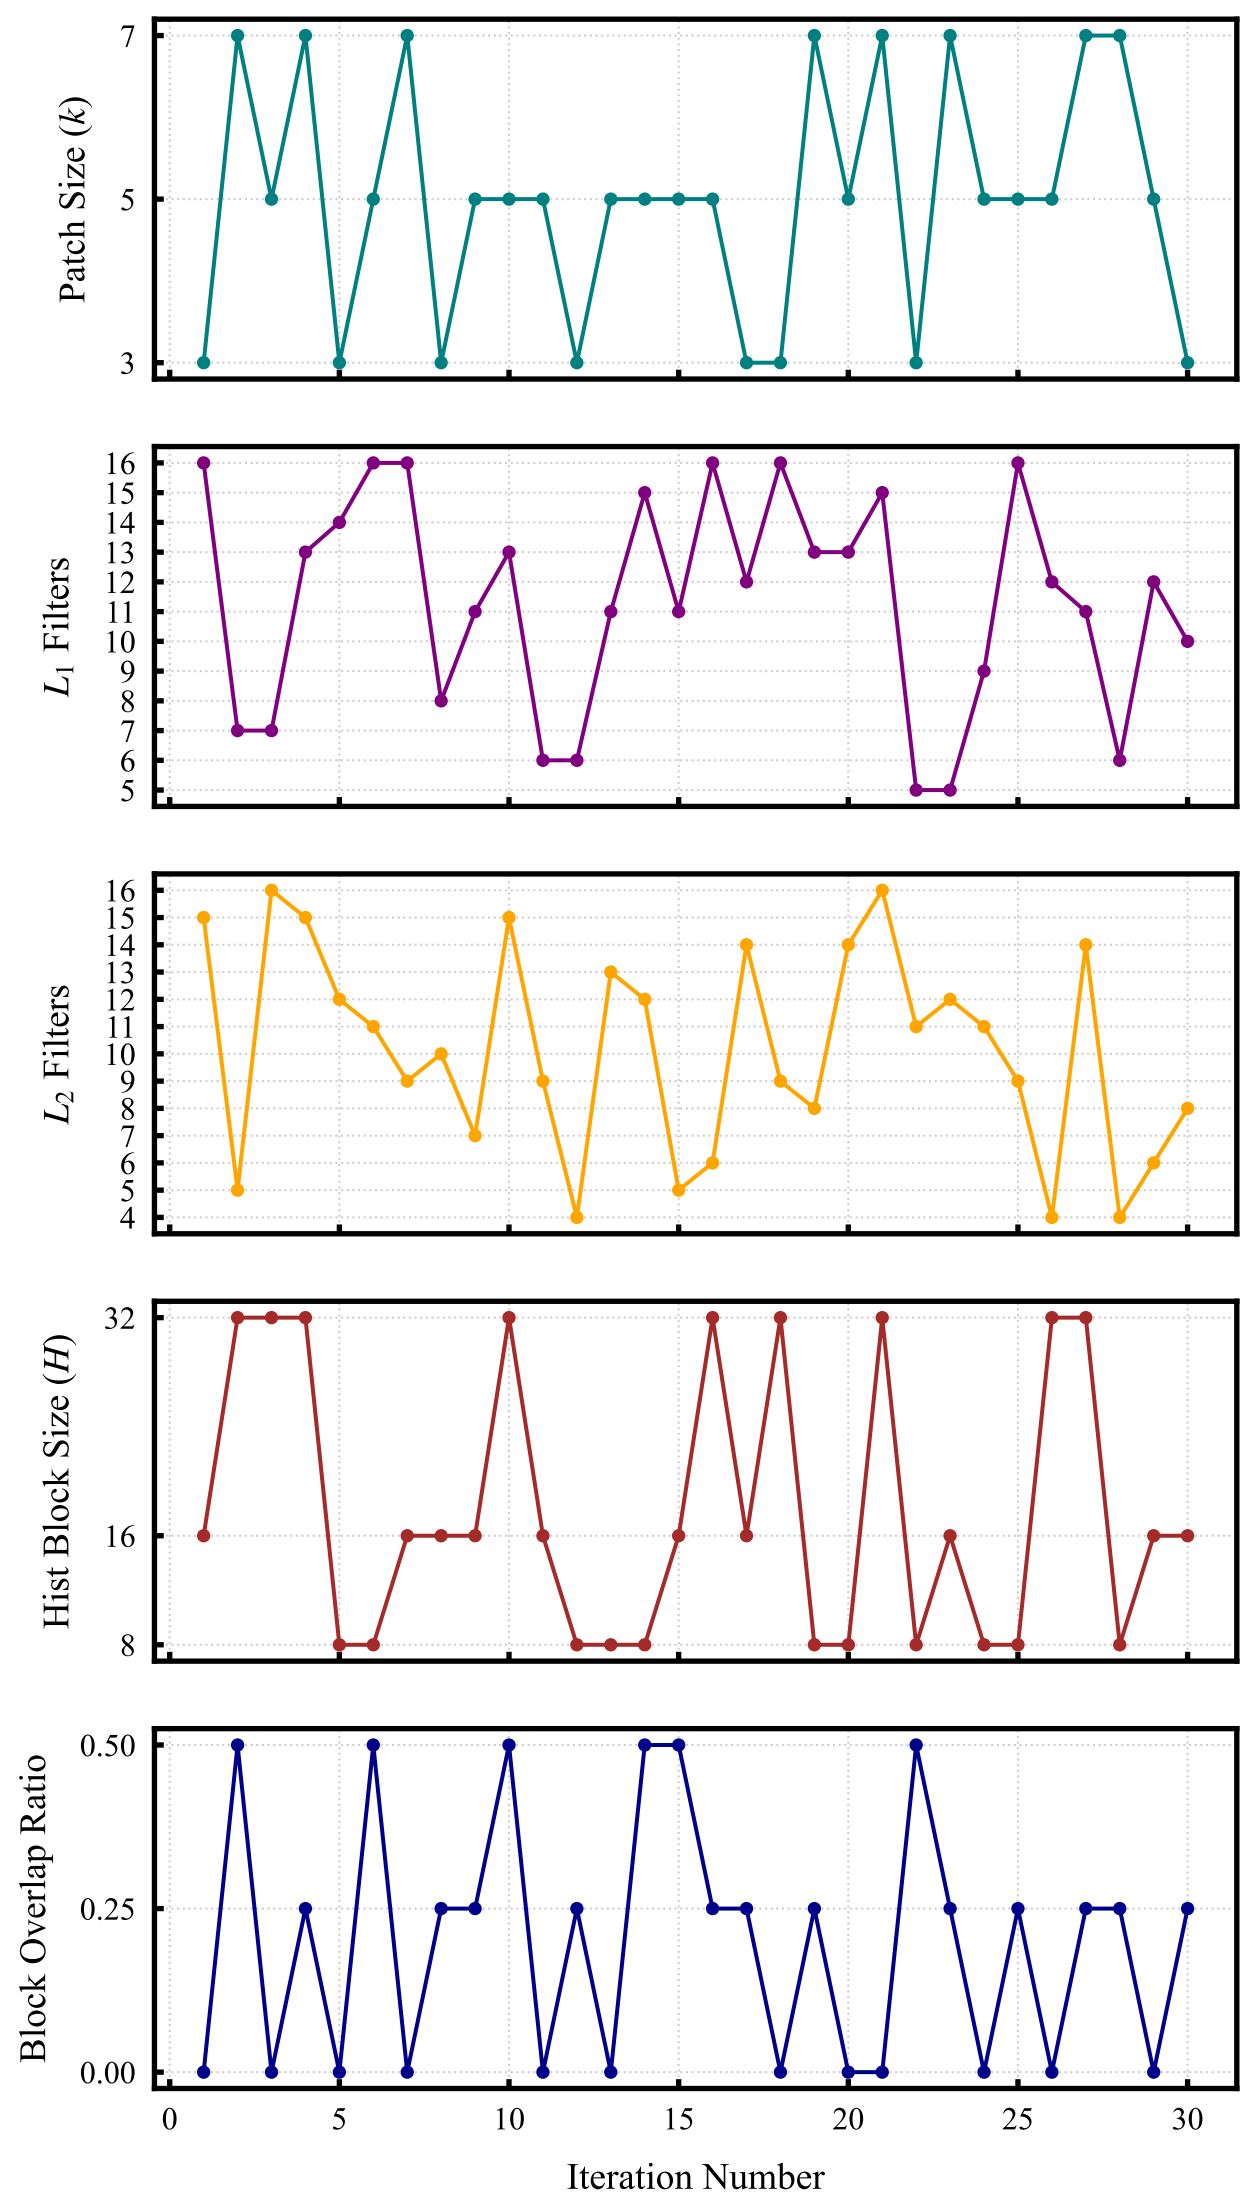

Supplement: d5ja00383k1.zip [file appendix_figure_A2_parameter_exploration.pdf › 新建文件夹/appendix_figure_A2_parameter_exploration.pdf]

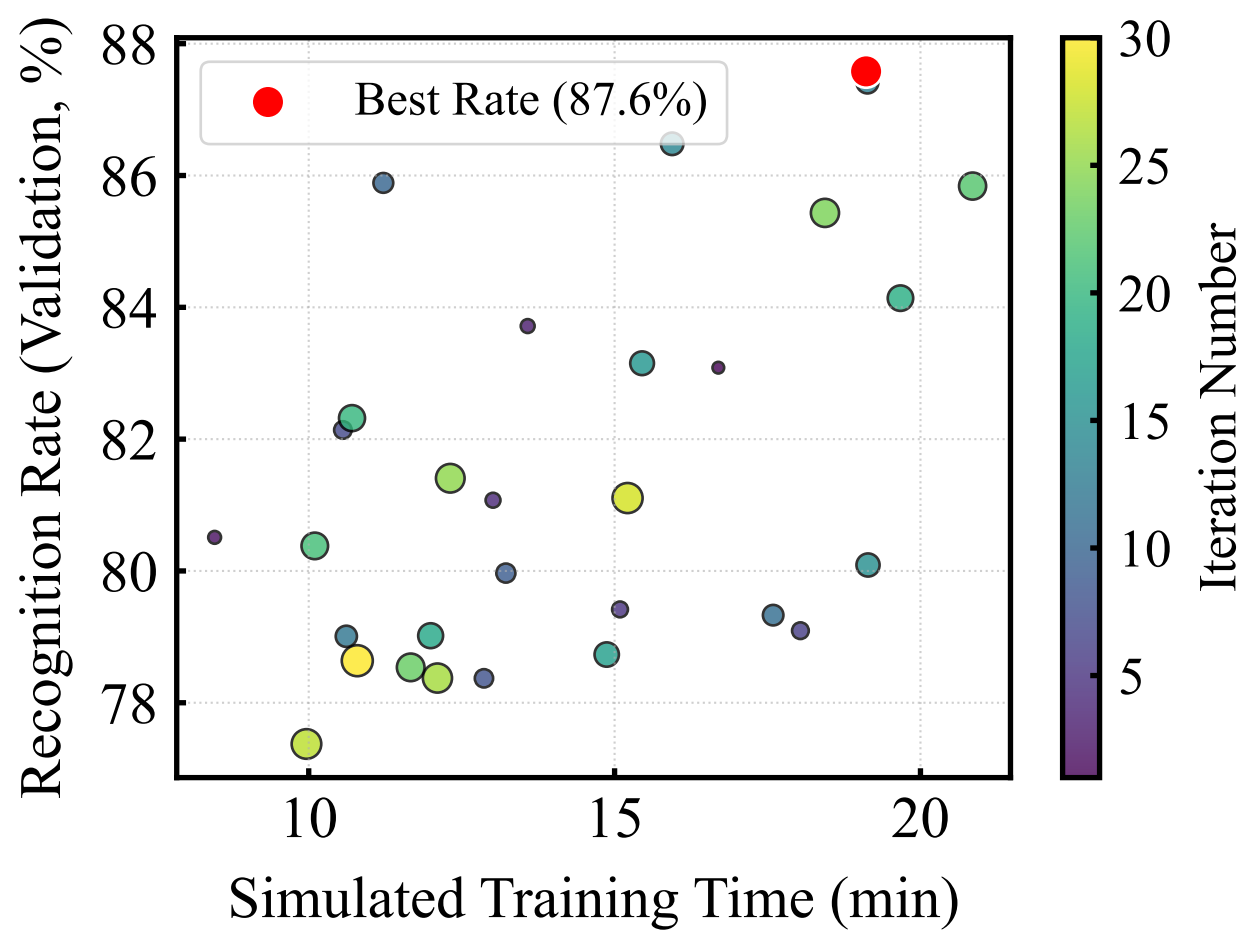

Supplement: d5ja00383k1.zip [file appendix_figure_A3_tradeoff_plot.pdf › 新建文件夹/appendix_figure_A3_tradeoff_plot.pdf]

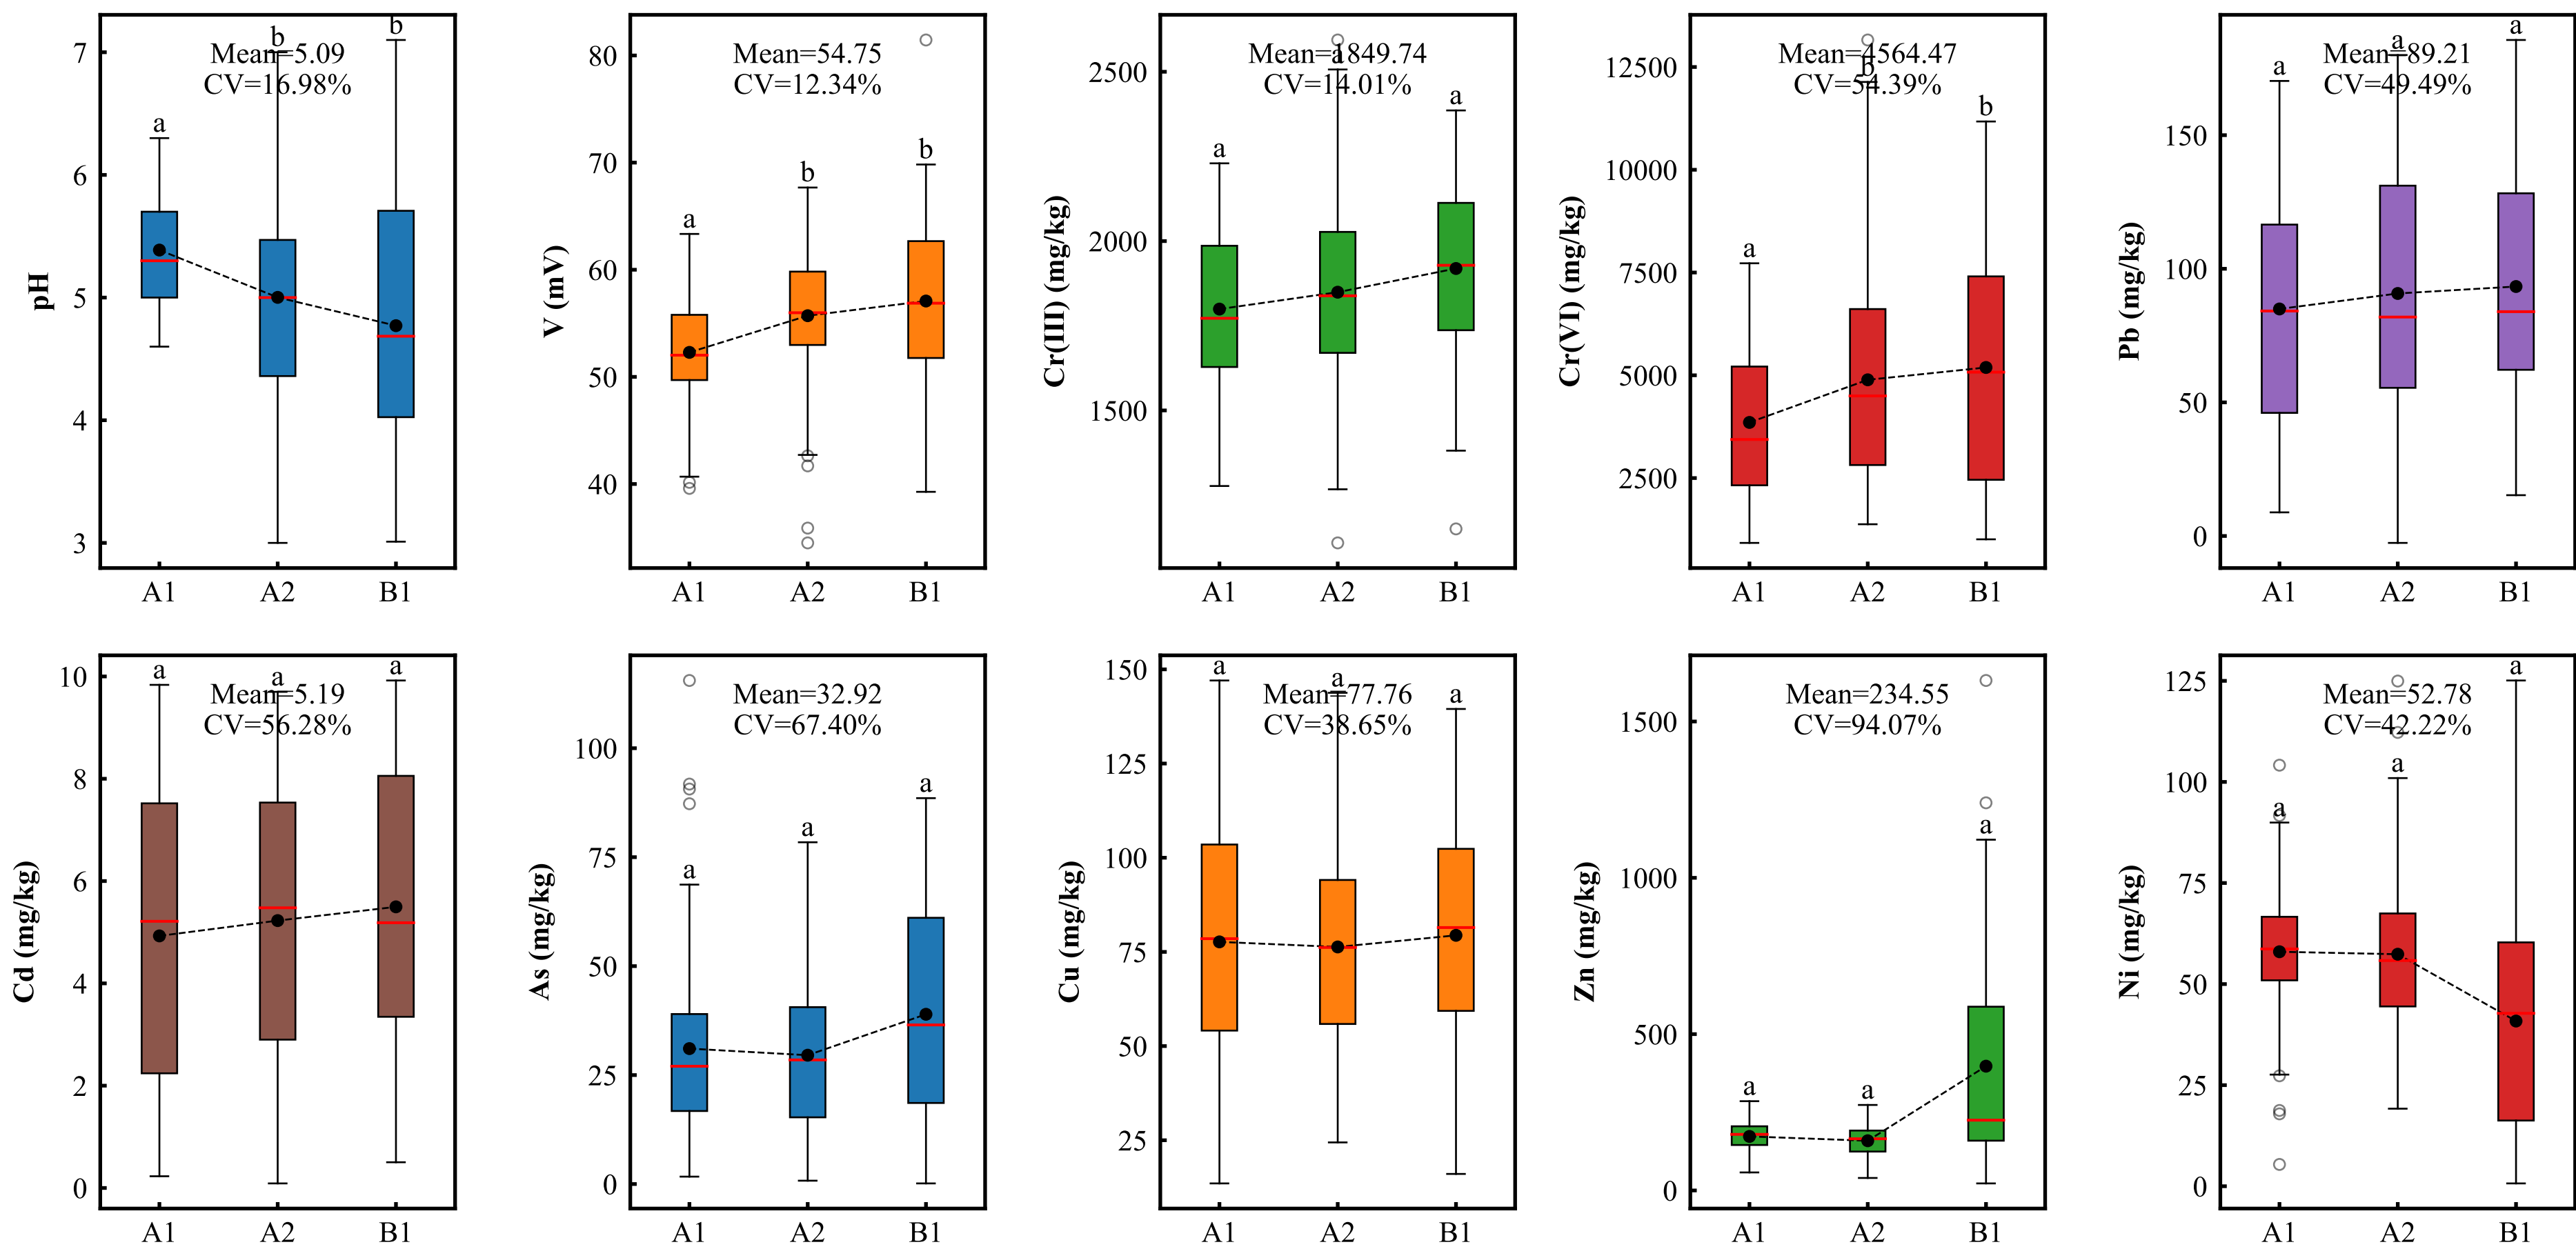

Supplement: d5ja00383k1.zip [file detail_value.pdf › 新建文件夹/detail_value.pdf]

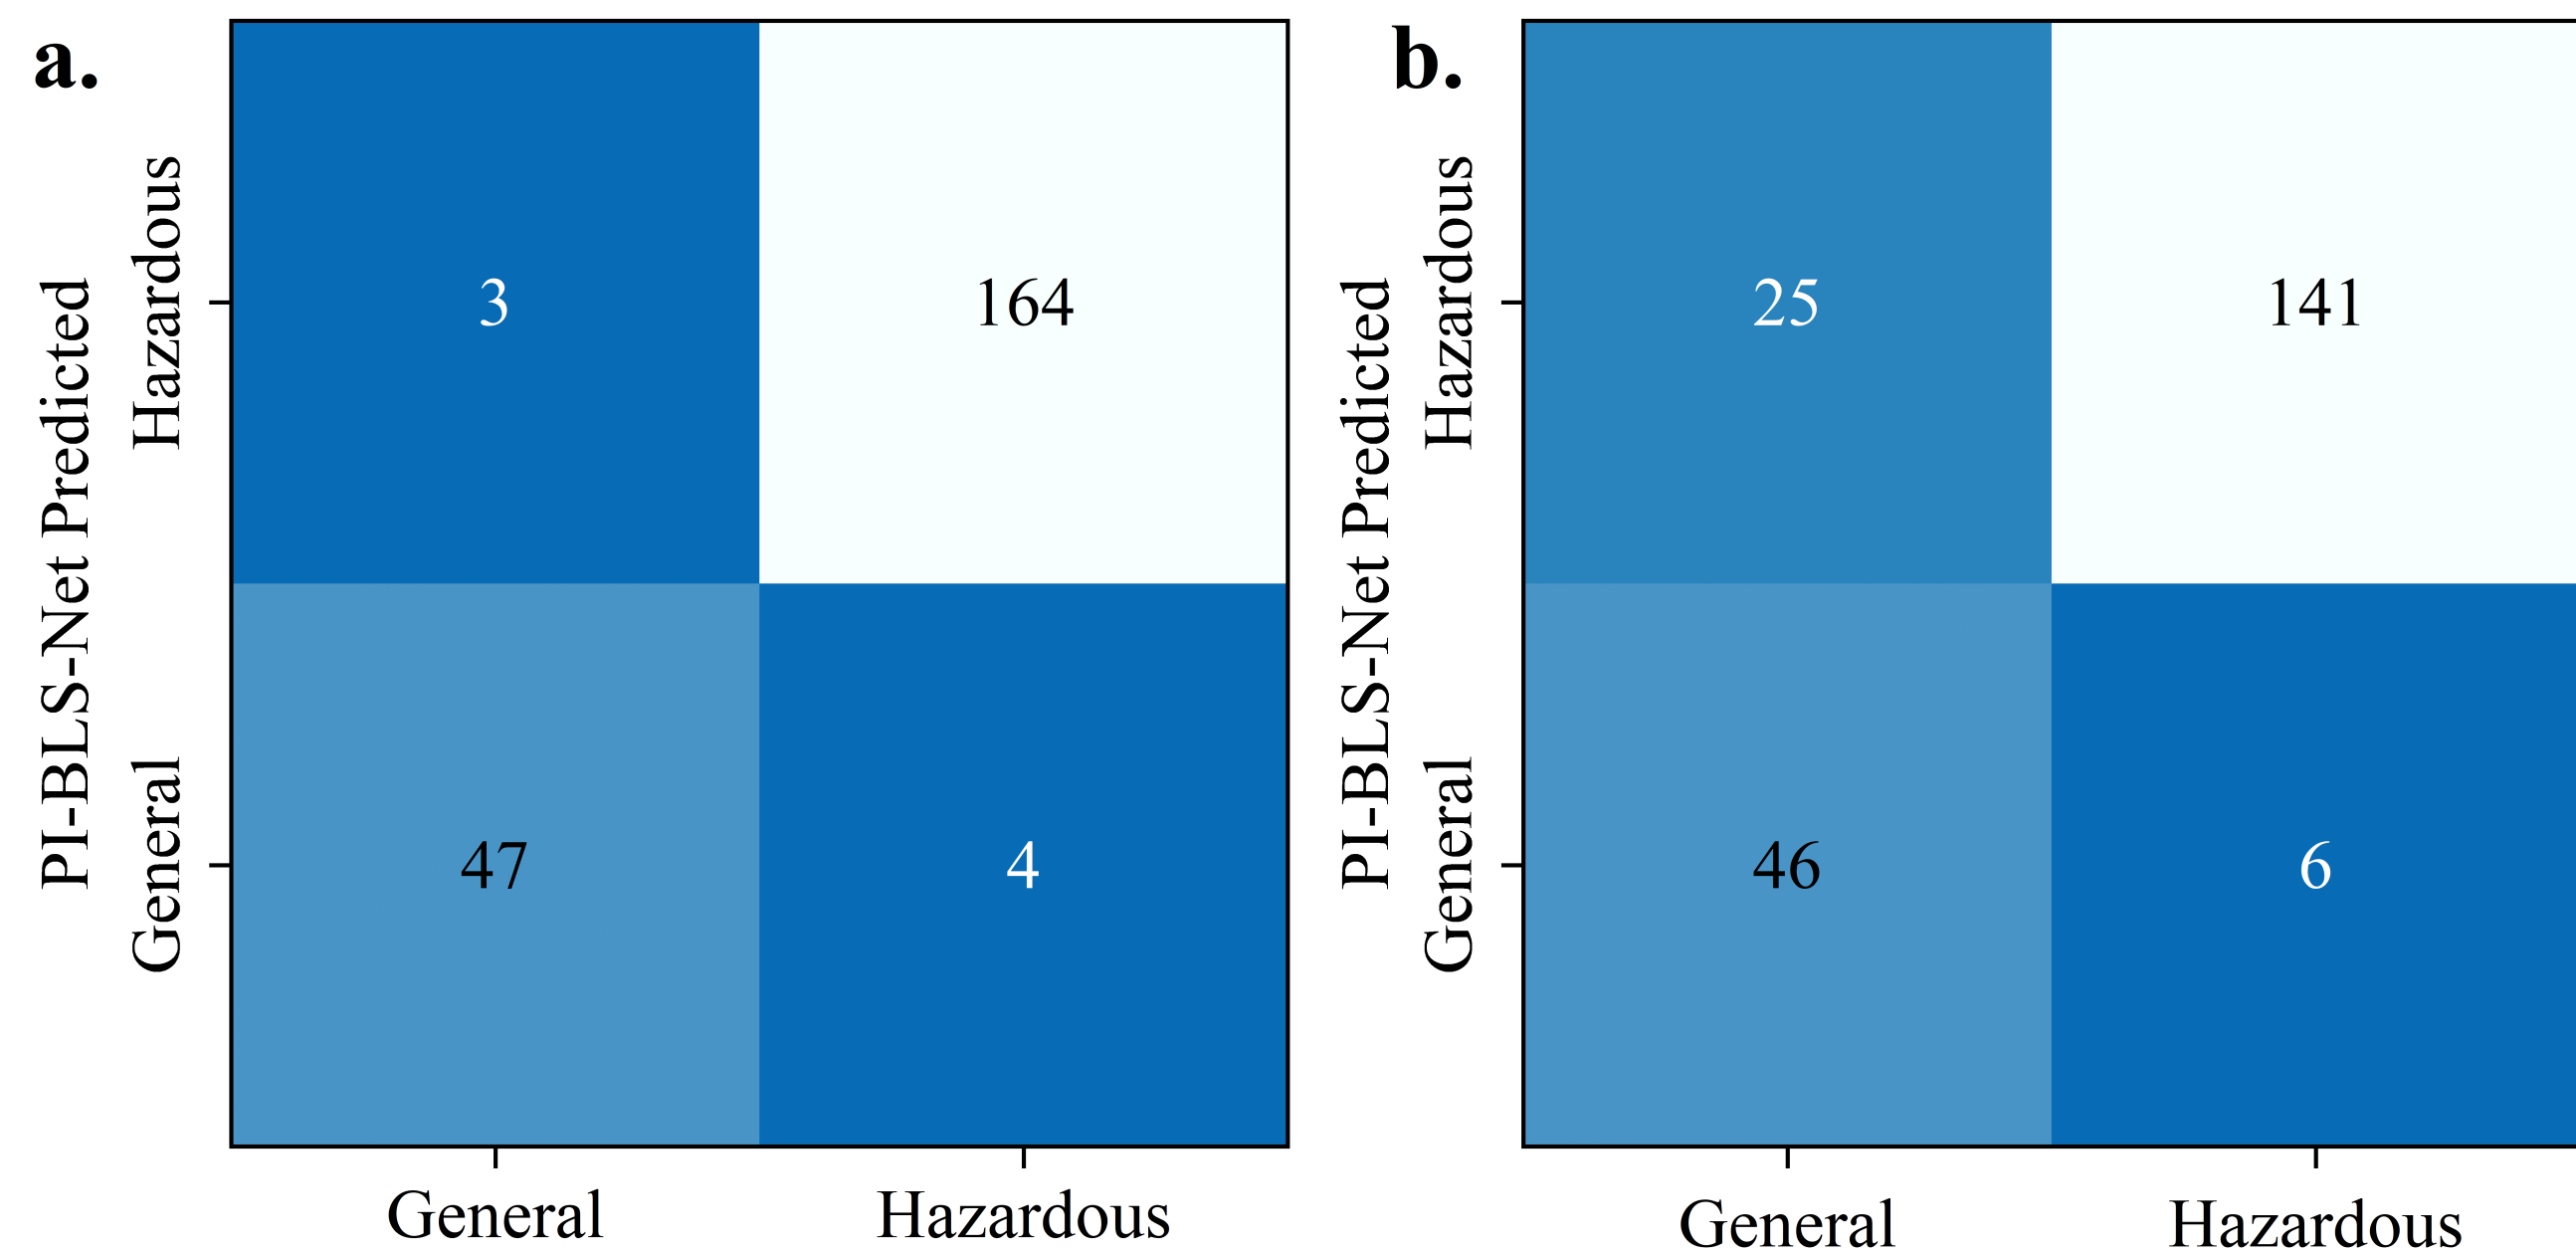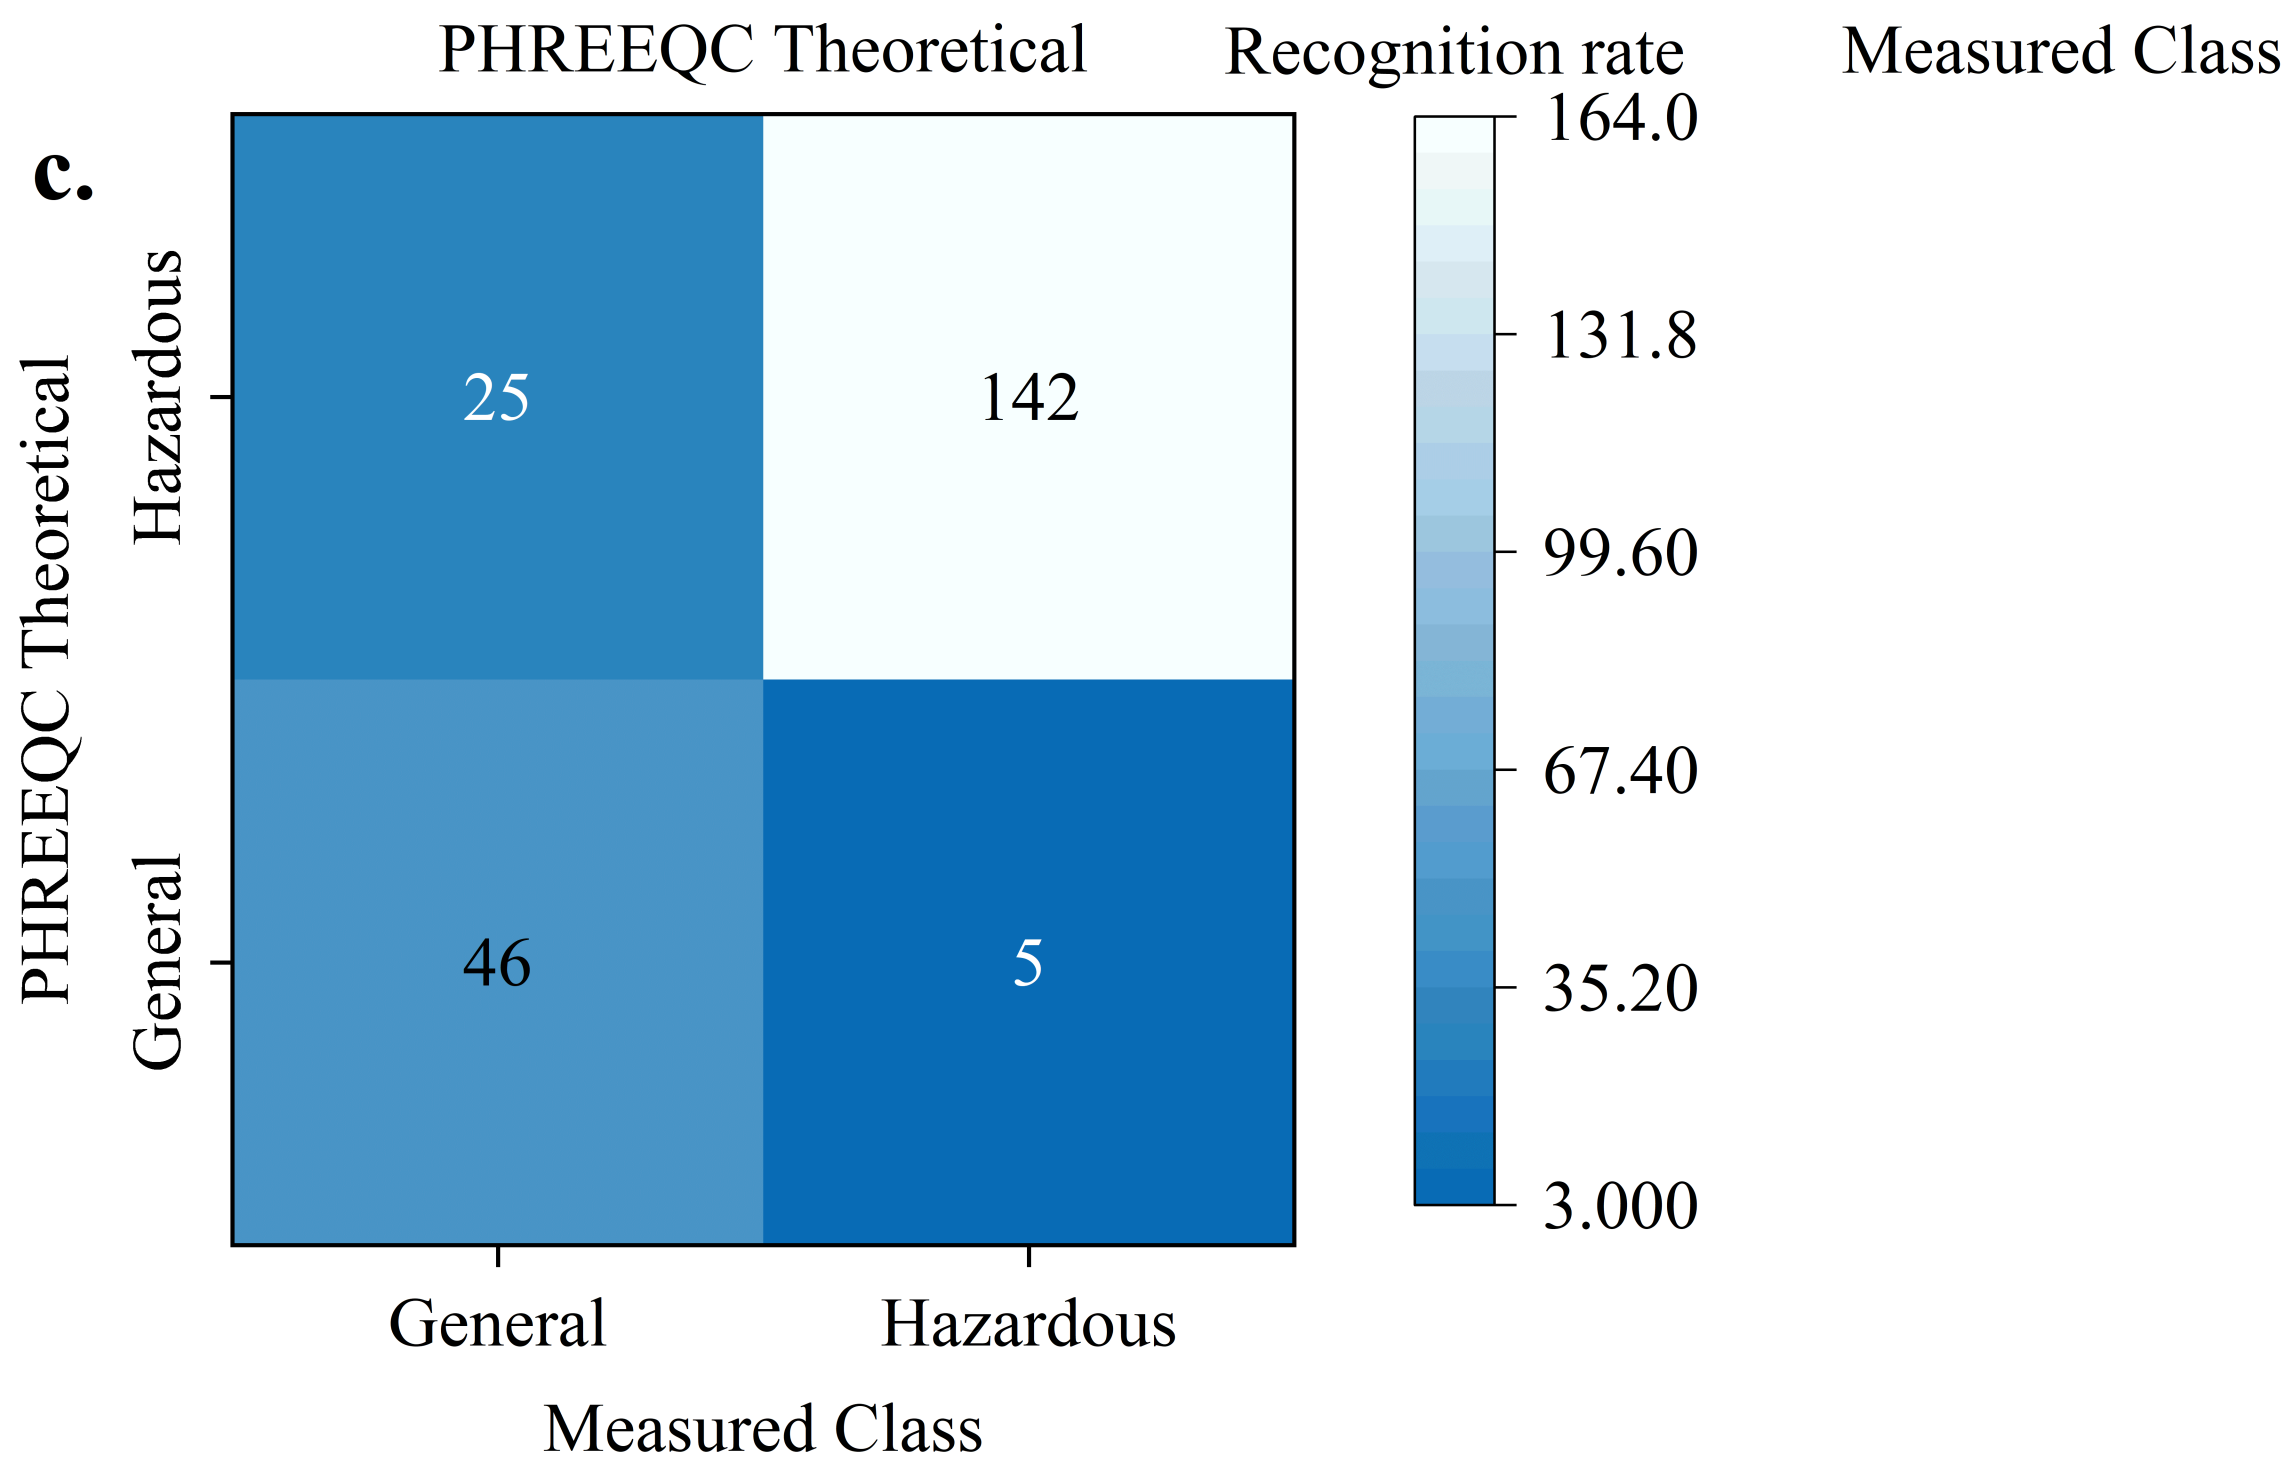

Supplement: d5ja00383k1.zip [file 软件模拟与预测Cr对比.pdf › 新建文件夹/软件模拟与预测Cr对比.pdf]
